# Supplementary material for: Cysteine Scanning Mutagenesis (Residues Glu52–Gly96) of the Human P2X1 Receptor for ATP: MAPPING AGONIST BINDING AND CHANNEL GATING
Source: PubMed Central journal article supplement — J Biol Chem. 2011 Jun 20;286(33):29207–17. doi: 10.1074/jbc.M111.260364 (PMC3190727; doi:10.1074/jbc.m111.260364), 2011-06-20
Supplement: supp_M111.260364_Supplementary_Figure_1.pdf [file supp_M111.260364_Supplementary_Figure_1.pdf]

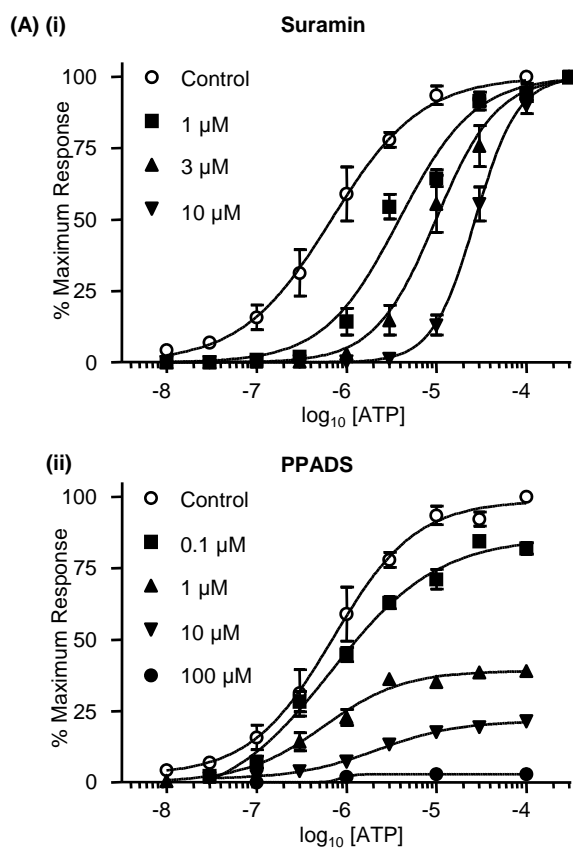

**Supplementary Figure 1. Characterisation of suramin and PPADS on the P2X1 receptor.** Antagonist action was tested on oocytes expressing WT P2X1 receptor by two-electrode voltage clamp (holding potential, -60mV). **A**, Concentration-response curves of the WT P2X1 receptor in the presence of **(i)** suramin and **(ii)** PPADS. There is a shift in the  $EC_{50}$  concentration of ATP with increasing concentrations of suramin with no change in the peak current. Increasing concentrations of PPADS causes a reduction in the peak response with no change of the ATP potency.
